# Supplementary material
Source: Research Square preprint supplement (doi:10.21203/rs.3.rs-9883334/v1)
Supplement: Supplementary file 1 [file 7de751f7be8138eb02fdf37b.docx]

**STROBE Checklist — Cohort Study**

*Manuscript: Angiographic Patterns of Supraclinoid ICA Blister-Like Aneurysms: Association with Lesion Instability and Natural History*

Journal: Neurosurgical Review

| **No** | **STROBE Item** | **Location in Manuscript** | **Line No.** |
| --- | --- | --- | --- |
| ***TITLE AND ABSTRACT*** | | | |
| **1** | Indicate study design in title or abstract; provide informative summary of what was done and found | Title (line 1); Abstract (lines 3–13) | Lines 1, 3–13 |
| ***INTRODUCTION*** | | | |
| **2** | Background/rationale: Explain scientific background and rationale | Introduction (lines 17–29) | Lines 17–29 |
| **3** | Objectives: State specific objectives, including prespecified hypotheses | Introduction, final paragraphs (lines 27–29) | Lines 27–29 |
| ***METHODS*** | | | |
| **4** | Study design: Present key elements early in the paper | Methods – Study Design (line 35) | Line 35 |
| **5** | Setting: Describe setting, locations, and relevant dates | Methods – Study Design (line 35) | Line 35 |
| **6** | Participants: Give eligibility criteria, sources and methods of selection | Methods – Inclusion/Exclusion Criteria (lines 37–67) | Lines 37–67 |
| **7** | Variables: Clearly define all outcomes, exposures, predictors, potential confounders | Methods – Angiographic Pattern Assessment, Outcome Measures (lines 77–101) | Lines 77–101 |
| **8** | Data sources/measurement: For each variable, give sources of data and assessment methods | Methods – Imaging Protocol, Morphometric Assessment (lines 69–75) | Lines 69–75 |
| **9** | Bias: Describe efforts to address potential sources of bias | Methods – Imaging Protocol (line 71); Limitations (lines 143–145) | Lines 71, 143–145 |
| **10** | Study size: Explain how study size was arrived at | Methods – Study Design (line 35) | Line 35 |
| **11** | Quantitative variables: Explain how quantitative variables were handled | Methods – Morphometric Assessment, Statistical Analysis (lines 75, 103–105) | Lines 75, 103–105 |
| **12** | Statistical methods: Describe all statistical methods | Methods – Statistical Analysis (lines 103–105) | Lines 103–105 |
| ***RESULTS*** | | | |
| **13** | Participants: Report numbers at each stage; give reasons for non-participation | Results – Cohort Characteristics; Figure 1 (lines 111, Figure 1) | Lines 111; Figure 1 |
| **14** | Descriptive data: Give characteristics of study participants | Results – Cohort Characteristics; Table 1 (lines 111, Table 1) | Lines 111; Table 1 |
| **15** | Outcome data: Report numbers of outcome events or summary measures | Results – Treatment Outcomes; Natural History (lines 117–123; Tables 3–4) | Lines 117–123; Tables 3–4 |
| **16** | Main results: Give unadjusted estimates and confounder-adjusted estimates if applicable | Results – all subsections; Tables 1–4 (lines 111–123) | Lines 111–123; Tables 1–4 |
| **17** | Other analyses: Report subgroup analyses or sensitivity analyses | Results – Natural History of Conservatively Managed Lesions (lines 121–123) | Lines 121–123 |
| ***DISCUSSION*** | | | |
| **18** | Key results: Summarise key results with reference to study objectives | Discussion – opening paragraphs (lines 127–131) | Lines 127–131 |
| **19** | Limitations: Discuss limitations, taking into account sources of bias | Discussion – Limitations (lines 143–145) | Lines 143–145 |
| **20** | Interpretation: Give cautious overall interpretation considering objectives and limitations | Discussion (lines 127–145) | Lines 127–145 |
| **21** | Generalisability: Discuss generalisability of study results | Discussion – Limitations (line 143) | Line 143 |
| ***OTHER INFORMATION*** | | | |
| **22** | Funding: Give source of funding and role of funders | Statements and Declarations – Funding | Title page |

*von Elm E, Altman DG, Egger M, et al. The Strengthening the Reporting of Observational Studies in Epidemiology (STROBE) statement: guidelines for reporting observational studies. Ann Intern Med. 2007;147:573–7.*
